# Supplementary material
Source: publisher figshare collection journal article supplement (https://karger.figshare.com/ndownloader/files/13662599)
Supplement: Supplementary file 1 [file 13662599]

## **Supplementary Material**

# **Prognostic Value of the Glasgow Prognostic Score or Modified Glasgow Prognostic Score for Patients with Colorectal Cancer Receiving Various Treatments: a Systematic Review and Meta-Analysis**

Liying He<sup>a,d</sup> Hui Li<sup>b,c</sup> Jianye Cai<sup>b,c</sup> Liang Chen<sup>b,c</sup> Jia Yao<sup>b,c</sup> Yingcai Zhang<sup>b,c</sup> Wanfu Xu<sup>a</sup>  
Lanlan Geng<sup>a</sup> Min Yang<sup>a</sup> Peiyu Chen<sup>a</sup> Jun Zheng<sup>b,c</sup> Yang Yang<sup>b,c</sup> Sitang Gong<sup>a</sup>

<sup>a</sup>Department of Gastroenterology, Guangzhou Women and Children's Medical Center, Guangzhou, <sup>b</sup>Department of Hepatic Surgery and Liver Transplantation Center of the Third Affiliated Hospital, Organ Transplantation Institute, Sun Yat-sen University, Guangzhou, <sup>c</sup>Guangdong Key Laboratory of Liver Disease Research, Key Laboratory of Liver Disease Biotherapy and Translational Medicine of Guangdong Higher Education Institutes, the Third Affiliated Hospital of Sun Yat-sen University, Guangzhou, <sup>d</sup>The First Affiliated Hospital of Jinan University, Guangzhou, China

**Table S1. Characteristics of included studies**

| Study           | Year | Country   | Design, center            | Models <sup>†</sup> | Endpoint <sup>‡</sup> | HRs      | n   | Age (Years) <sup>§</sup>                | Male(%) | Therapies    | TNM Stage (cases, %)                                                           | Other covariates                                                                                                                                     |
|-----------------|------|-----------|---------------------------|---------------------|-----------------------|----------|-----|-----------------------------------------|---------|--------------|--------------------------------------------------------------------------------|------------------------------------------------------------------------------------------------------------------------------------------------------|
| Adachi et al.   | 2014 | Japan     | Prospective, one center   | mGPS                | OS                    | Reported | 65  | 64 (17-38)                              | 59.6%   | Resection    | Unclear                                                                        | pN; Systemic chemotherapy                                                                                                                            |
| Chan et al.     | 2017 | Australia | Retrospective, database   | mGPS                | OS                    | Reported | 386 | Unclear                                 | Unclear | Resection    | Unclear                                                                        | Age; T stage; N stage; Grade; MMR-BRAF status; NLR; LMR; PLR                                                                                         |
| Choi et al.     | 2014 | Korea     | Retrospective, one center | GPS                 | CSS                   | Reported | 105 | 63 (32-86)                              | 60%     | Resection    | I :12(11.4%);<br>II:29(27.6%);<br>III:40(38.1%);<br>IV:24(22.9%)               | Hemoglobin; CEA; Gross appearance; TNM stage; Differentiation                                                                                        |
| Furukawa et al. | 2011 | Japan     | Retrospective, one center | GPS                 | OS                    | Reported | 40  | Group A: 66.4±10.1<br>Group B: 64.9±7.6 | 75%     | Chemotherapy | II+III:11(27.5%);<br>IV:29(72.5%)                                              | Primary tumor resection; Chemotherapy for CRLM; Serum CEA; Serum CA19-9;                                                                             |
| Guthrie et al.  | 2013 | UK        | Prospective, one center   | mGPS                | CSS                   | Reported | 206 | Unclear                                 | 58.3%   | Resection    | I :32(15.5%);<br>II:85(41.3%);<br>III:87(42.2%);<br>IV:2(1.0%)                 | NLR                                                                                                                                                  |
| Hong et al.     | 2017 | China     | Retrospective, one center | mGPS                | CSS                   | Reported | 571 | 62.99±11.78                             | 52%     | Resection    | I :118(20.7%);<br>II:201(35.2%);<br>III:252(44.1%)                             | IPI; Age; N stage; Tumor deposits                                                                                                                    |
| Ide et al.      | 2017 | Japan     | Retrospective, one center | mGPS                | OS&CSS                | Reported | 115 | 64 (33-83)                              | 71%     | Resection    | I :13(11.3%);<br>II:20(17.4%);<br>III:82(71.3%)                                | Pretreatment TNM stage; Pathological TNM stage; Vascular invasion; Pretreatment CEA; CAR                                                             |
| Inoue et al.    | 2013 | Japan     | Retrospective, one center | mGPS                | CSS                   | Reported | 163 | Unclear                                 | Unclear | Chemotherapy | Unclear                                                                        | Age; PS; Timing of metastasis; Pathology; Metastatic site; CEA level; Response rate                                                                  |
| Ishizuka et al. | 2012 | Japan     | Retrospective, one center | GPS                 | OS&CSS                | Reported | 271 | Unclear                                 | Unclear | Resection    | 0:16(5.9%);<br>I :66(24.4%);<br>II:92(33.9%);<br>III:76(28.0%);<br>IV:21(7.7%) | Lymphatic invasion; Lymph node metastasis; Platelet count; CRP; CEA; TNM stage                                                                       |
| Kim et al.      | 2017 | Korea     | Retrospective, one center | mGPS                | OS&CSS                | Reported | 503 | 62 (18-88)                              | 63%     | Chemotherapy | Unclear                                                                        | Histological type; Primary tumor status; NLR at prechemotherapy; CEA at prechemotherapy; Number of metastatic organs; NLR change pattern; CEA change |

|                 |      |                         |                                 |          |        |                               |                                   |                          |                      |                            |                                                                    | pattern                                                                                                                                               |
|-----------------|------|-------------------------|---------------------------------|----------|--------|-------------------------------|-----------------------------------|--------------------------|----------------------|----------------------------|--------------------------------------------------------------------|-------------------------------------------------------------------------------------------------------------------------------------------------------|
| Kishiki et al.  | 2013 | Japan                   | Retrospective, one center       | mGPS     | CSS    | Extracted from survival plots | 79                                | Unclear                  | 53.2%                | Resection                  | IV:79(100%)                                                        | Hemoglobin; Adjuvant chemotherapy                                                                                                                     |
| Kostner et al.  | 2016 | Sweden; Finland; Norway | Retrospective, multiple centers | GPS      | OS     | Reported                      | 427                               | Unclear                  | Unclear              | Resection                  | Unclear                                                            | Age; Postop chemotherapy; Size of the largest liver metastasis; Number of liver metastasis; Albumin continuous variable; CRP continuous variable; CRP |
| Leitch et al.   | 2007 | UK                      | Retrospective, one center       | mGPS     | OS&CSS | Reported                      | Resectable:149<br>Unresectable:84 | R: Unclear<br>U: Unclear | R: 54.4%<br>U: 57.1% | Resection;<br>Chemotherapy | I :22(9.4%);<br>II :62(26.6%);<br>III:65(27.9%);<br>IV:84(36.1%)   | Age; TNM stage; Monocyte count; Single liver metastasis; Extra-hepatic disease; Chemotherapy treatment                                                |
| Lin et al.      | 2015 | China                   | Retrospective, one center       | GPS      | OS     | Reported                      | 99                                | Unclear                  | 35.4%                | Resection                  | II:99(100%)                                                        | CRP; ALB; Vascular invasion; Perineural invasion; Histology grades; KPS; CEA                                                                          |
| Maillet et al.  | 2014 | France                  | Retrospective, one center       | GPS      | OS&CSS | Extracted from survival plots | 80                                | 65 (36-83)               | 56.3%                | Chemotherapy               | Unclear                                                            | ECOG PS; Haemoglobin                                                                                                                                  |
| McSorley et al. | 2017 | UK                      | Retrospective, one center       | mGPS     | CSS    | Reported                      | 70                                | Unclear                  | 54.3%                | Resection                  | Unclear                                                            | N stage; SUV peak; TLG                                                                                                                                |
| Moug et al.     | 2010 | UK                      | Retrospective, two centers      | mGPS     | OS     | Reported                      | 206                               | 69.9±10.6(40-95)         | 55.3%                | Resection                  | I :13(6.3%);<br>II :38(18.4%);<br>III:108(52.4%);<br>IV:47(22.8%)  | Age; Node category; Tumor stage; pLNR                                                                                                                 |
| Ni et al.       | 2016 | China                   | Retrospective, one centers      | GPS/mGPS | OS     | Reported                      | 148                               | 60.2 (20-74)             | 65.5%                | Chemotherapy               | IV:148(100%)                                                       | Sex; Age; Location of primary tumor; Metastasis number; Hemoglobin; Globulin; CRP/Alb; NLR; PLR; MLR                                                  |
| Nozoe et al.    | 2014 | Japan                   | Retrospective, one centers      | GPS/mGPS | OS     | Extracted from survival plots | 272                               | 70.4 (24-90)             | 58.8%                | Resection                  | I :69(25.4%);<br>II :78(28.7%);<br>III:92(33.8%);<br>IV:33(12.1%)  | Tumor stage; Venous invasion                                                                                                                          |
| Park et al.     | 2015 | UK                      | Retrospective, one center       | mGPS     | OS&CSS | Reported                      | 1000                              | Unclear                  | 54.8%                | Resection                  | 0:13(1.3%);<br>I :148(14.8%);<br>II :457(45.7%);<br>III:382(38.2%) | Age; Presentation; Adjuvant therapy; T stage; N stage; Differentiation; Venous invasion; Margin involvement; Peritoneal involvement                   |
| Powell et al.   | 2012 | UK                      | Prospective one center          | mGPS     | CSS    | Reported                      | 411                               | Unclear                  | 55.2%                | Resection                  | I :42(10.2%);<br>II :189(46.0%);<br>III:180(43.8%)                 | Age; T stage; Lymph node ratio; Tumor stage; Peterson index; Klintrup score                                                                           |
| Read et al.     | 2009 | Australia               | Retrospective, two centers      | GPS      | OS     | Extracted from survival plots | 51                                | 64 (40-79)               | 58.8%                | Chemotherapy               | IV:51(100%)                                                        | CRP; Type of treatment; PS; SAP                                                                                                                       |

|                  |      |           |                                 |           |        |                               |     |             |       |              |                                                                      |                                                                                                                            |
|------------------|------|-----------|---------------------------------|-----------|--------|-------------------------------|-----|-------------|-------|--------------|----------------------------------------------------------------------|----------------------------------------------------------------------------------------------------------------------------|
| Sharma et al.    | 2008 | Australia | Retrospective, multiple centers | GPS       | OS     | Extracted from survival plots | 52  | 70.5        | 64%   | Chemotherapy | IV:52(100%)                                                          | An elevated CEA                                                                                                            |
| Shibutani et al. | 2015 | Japan     | Retrospective, one center       | GPS       | OS&CSS | Reported                      | 110 | 64 (27-86)  | 57.3% | Chemotherapy | Unclear                                                              | No. of organs affected by metastasis; Pre-treatment CEA; Pre-treatment NLR; Pre-treatment CRP; Pro-treatment CRP           |
| Shimura et al.   | 2017 | Japan     | Retrospective, one center       | mGPS      | OS     | Reported                      | 92  | 65 (31-90)  | 61.9% | Resection    | IV:92(100%)                                                          | CEA; NLR; Performance status; Histology; T factor; Peritoneal metastasis; Number of metastatic organs; Age; Tumor location |
| Son et al.       | 2013 | Korea     | Retrospective, one center       | mGPS      | CSS    | Reported                      | 624 | Unclear     | 58.9% | Resection    | I :79(12.7%);<br>II :233(37.3%);<br>III :312(50.0%)                  | Tumor stage; CEA level; Fibrinogen-level; Grade; Age; NLR; PLR; Chemotherapy                                               |
| Song et al.      | 2015 | Korea     | Retrospective, one center       | mGPS      | OS     | Reported                      | 177 | 52 (25-81)  | 46.9% | Chemotherapy | Unclear                                                              | LMR; CA19-9; AST; KM treatment duration                                                                                    |
| Sugimoto et al.  | 2012 | Japan     | Retrospective, one center       | GPS       | CSS    | Reported                      | 366 | Unclear     | 57.1% | Resection    | II :166(45.4%);<br>III :200(54.6%)                                   | Invasion depth; Degree of lymphatic invasion; Degree of venous invasion; Metastatic lymph nodes; Residual tumor; Location  |
| Sun et al.       | 2014 | China     | Retrospective, one center       | mGPS      | OS&CSS | Reported                      | 255 | 59.47±12.63 | 52.9% | Resection    | I :29(11.4%);<br>II :139(54.5%);<br>III :87(34.1%)                   | PLR; NLR; WBC count; AFP; CEA; Vascular invasion; Fibrinogen; BMI; TNM stage; Grade                                        |
| Toiyama et al.   | 2011 | Japan     | Retrospective, one center       | GPS/ mGPS | OS&CSS | Reported                      | 219 | 66 (29-91)  | 62.1% | Chemotherapy | II :125(57.1%);<br>III :94(42.9%)                                    | Age; Gender; Chemotherapy; Venous invasion; Serosal invasion; Pathology; CEA                                               |
| Tokunaga et al.  | 2017 | Japan     | Retrospective, one center       | mGPS      | OS&CSS | Reported                      | 468 | 68 (19-93)  | 59.2% | Resection    | I :197(42.1%);<br>II :149(31.8%);<br>III :122(26.1%)                 | PNI                                                                                                                        |
| Tunc et al.      | 2015 | Turkey    | Retrospective, one center       | GPS       | CSS    | Reported                      | 115 | 66 (32-91)  | 56%   | Resection    | I + II :58(50.4%);<br>III + IV :57(49.6%)                            | Age; CEA; Poorly differentiated tumor                                                                                      |
| Watt et al.      | 2016 | UK        | Retrospective, one center       | mGPS      | OS&CSS | Reported                      | 813 | Unclear     | 54.6% | Resection    | 0 :11(1.4%);<br>I :132(16.2%);<br>II :356(43.8%);<br>III :314(38.6%) | None                                                                                                                       |
| Yamamoto et al.  | 2012 | Japan     | Retrospective, two centers      | mGPS      | CSS    | Reported                      | 42  | Unclear     | 61.9% | Chemotherapy | Unclear                                                              | Age; Advanced/recurrent; D-dimer                                                                                           |

† Model: GPS: Glasgow prognostic score; mGPS: Modified Glasgow prognostic score.

‡ Endpoint: OS: Overall survival; CSS: Cancer-specific survival.

<sup>§</sup>Age was expressed as mean with standard deviation or medians with interquartile ranges. For studies where age of patients with CRC was not available, it was expressed as unclear.

pN: p N stage; NLR: Neutrophil-to-lymphocyte ratio; MLR, monocyte-to-lymphocyte ratio; LMR: Lymphocyte-to-monocyte ratio; PLR: Platelet-to-lymphocyte ratio; IPI: inflammation related prognostic index; CEA: Carcinoembryonic antigen; CA19-9: carbohydrate antigen 19-9; CAR: C-reactive protein-to-albumin; PS: performance status; CRP: C-reactive protein; ALB: Albumine; CEA: Carcinoembryonic antigen; KPS: Karnofsky Performance Status; ECOG-PS: Eastern cooperative oncology group performance status; SUV peak: Peak standardised uptake value; TLG: total lesion glycolysis; pLNR: Positive lymph node ratio; SAP: serum alkaline phosphatase; AFP: Alpha-fetoprotein; BMI: Body mass index; KM: Korean Medicine; AST: Aspartate aminotransferase; PNI: Prognostic nutritional index.
